# Supplementary material
Source: PubMed Central journal article supplement (PMC6339855)
Supplement: NIHMS1508213-supplement-1.pdf [file NIHMS1508213-supplement-1.pdf]

Table S1. Activities of attP mutants.

| #  | Mutant | In vitro integration | Std dev | In vivo integration | attP binding | Std dev |
|----|--------|----------------------|---------|---------------------|--------------|---------|
| 1  | 1A     | 0.491                | 0.025   | +++                 | 0.685        | 0.027   |
| 2  | 1G     | 0.582                | 0.027   | +++                 | 0.737        | 0.056   |
| 3  | 1C     | 0.273                | 0.031   | +++                 | 0.729        | 0.035   |
| 4  | 2A     | 0.075                | 0.070   | ++                  | 0.666        | 0.098   |
| 5  | 2T     | 0.643                | 0.063   | +++                 | 0.725        | 0.040   |
| 6  | 2G     | 0.098                | 0.028   | +++                 | 0.755        | 0.028   |
| 7  | 2C     | 0.252                | 0.092   | ++                  | 0.531        | 0.062   |
| 8  | 3A     | 0.485                | 0.068   | +++                 | 0.664        | 0.085   |
| 9  | 3T     | 0.563                | 0.014   | +++                 | 0.686        | 0.127   |
| 10 | 3G     | 0.338                | 0.032   | +++                 | 0.765        | 0.028   |
| 11 | 3C     | 0.717                | 0.014   | +++                 | 0.733        | 0.067   |
| 12 | 4A     | 0.434                | 0.018   | +++                 | 0.620        | 0.088   |
| 13 | 4T     | 0.484                | 0.009   | +++                 | 0.739        | 0.016   |
| 14 | 4G     | 0.365                | 0.020   | +++                 | 0.675        | 0.029   |
| 15 | 5A     | 0.562                | 0.029   | +++                 | 0.750        | 0.041   |
| 16 | 5G     | 0.191                | 0.029   | ++                  | 0.657        | 0.067   |
| 17 | 5C     | 0.435                | 0.021   | +++                 | 0.633        | 0.090   |
| 18 | 6A     | 0.510                | 0.016   | ++                  | 0.644        | 0.102   |
| 19 | 6T     | 0.523                | 0.004   | +++                 | 0.684        | 0.071   |
| 20 | 6G     | 0.484                | 0.006   | +++                 | 0.731        | 0.028   |
| 21 | 7A     | 0.515                | 0.018   | +++                 | 0.706        | 0.051   |
| 22 | 7G     | 0.519                | 0.002   | +++                 | 0.708        | 0.094   |
| 23 | 7C     | 0.644                | 0.022   | +++                 | 0.721        | 0.084   |
| 24 | 8A     | 0.507                | 0.021   | +++                 | 0.645        | 0.065   |
| 25 | 8T     | 0.506                | 0.009   | +++                 | 0.674        | 0.075   |
| 26 | 8G     | 0.546                | 0.018   | +++                 | 0.724        | 0.043   |
| 27 | 8C     | 0.499                | 0.046   | +++                 | 0.713        | 0.062   |
| 28 | 9A     | 0.497                | 0.033   | +++                 | 0.721        | 0.077   |
| 29 | 9T     | 0.507                | 0.018   | +++                 | 0.367        | 0.023   |
| 30 | 9G     | 0.468                | 0.005   | +++                 | 0.659        | 0.079   |
| 31 | 9C     | 0.583                | 0.013   | +++                 | 0.744        | 0.063   |
| 32 | 10A    | 0.446                | 0.017   | +++                 | 0.688        | 0.045   |
| 33 | 10T    | 0.510                | 0.017   | +++                 | 0.711        | 0.063   |
| 34 | 10G    | 0.474                | 0.026   | +++                 | 0.697        | 0.065   |
| 35 | 10C    | 0.481                | 0.029   | +++                 | 0.696        | 0.053   |
| 36 | 11A    | 0.474                | 0.033   | +++                 | 0.681        | 0.046   |

|    |     |       |       |     |       |       |
|----|-----|-------|-------|-----|-------|-------|
| 37 | 11G | 0.355 | 0.026 | ++  | 0.583 | 0.038 |
| 38 | 11C | 0.430 | 0.017 | +++ | 0.656 | 0.035 |
| 39 | 12A | 0.480 | 0.028 | +++ | 0.719 | 0.024 |
| 40 | 12G | 0.451 | 0.042 | +++ | 0.683 | 0.072 |
| 41 | 12C | 0.421 | 0.014 | +++ | 0.684 | 0.047 |
| 42 | 13A | 0.486 | 0.015 | +++ | 0.768 | 0.022 |
| 43 | 13T | 0.397 | 0.021 | +++ | 0.689 | 0.043 |
| 44 | 13C | 0.436 | 0.012 | +++ | 0.690 | 0.059 |
| 45 | 14A | 0.128 | 0.028 | +   | 0.515 | 0.073 |
| 46 | 14T | 0.183 | 0.038 | ++  | 0.631 | 0.037 |
| 47 | 14G | 0.279 | 0.040 | ++  | 0.651 | 0.052 |
| 48 | 15A | 0.143 | 0.018 | ++  | 0.558 | 0.063 |
| 49 | 15T | 0.479 | 0.011 | +++ | 0.810 | 0.016 |
| 50 | 15G | 0.012 | 0.063 | +   | 0.327 | 0.093 |
| 51 | 15C | 0.508 | 0.009 | +++ | 0.675 | 0.101 |
| 52 | 16A | 0.429 | 0.028 | ++  | 0.668 | 0.035 |
| 53 | 16T | 0.333 | 0.012 | ++  | 0.706 | 0.031 |
| 54 | 16G | 0.414 | 0.005 | +++ | 0.674 | 0.031 |
| 55 | 17A | 0.513 | 0.019 | +++ | 0.737 | 0.025 |
| 56 | 17G | 0.470 | 0.020 | +++ | 0.705 | 0.023 |
| 57 | 17C | 0.488 | 0.019 | +++ | 0.687 | 0.124 |
| 58 | 18T | 0.434 | 0.016 | +++ | 0.668 | 0.071 |
| 59 | 18G | 0.460 | 0.026 | +++ | 0.696 | 0.101 |
| 60 | 18C | 0.472 | 0.001 | +++ | 0.702 | 0.099 |
| 61 | 19A | 0.108 | 0.036 | ++  | 0.482 | 0.056 |
| 62 | 19G | 0.461 | 0.004 | +++ | 0.698 | 0.073 |
| 63 | 19C | 0.035 | 0.029 | +   | 0.680 | 0.081 |
| 64 | 20A | 0.426 | 0.013 | +++ | 0.370 | 0.056 |
| 65 | 20T | 0.060 | 0.022 | ++  | 0.407 | 0.149 |
| 66 | 20C | 0.087 | 0.019 | ++  | 0.425 | 0.136 |
| 67 | 21A | 0.493 | 0.007 | +++ | 0.662 | 0.036 |
| 68 | 21T | 0.457 | 0.036 | +++ | 0.621 | 0.069 |
| 69 | 21G | 0.474 | 0.026 | +++ | 0.672 | 0.075 |
| 70 | 21C | 0.456 | 0.031 | +++ | 0.688 | 0.028 |
| 71 | 22A | 0.401 | 0.033 | +++ | 0.582 | 0.079 |
| 72 | 22G | 0.369 | 0.022 | ++  | 0.602 | 0.075 |
| 73 | 22C | 0.386 | 0.013 | +++ | 0.710 | 0.011 |
| 74 | 23A | 0.194 | 0.029 | ++  | 0.555 | 0.047 |
| 75 | 23G | 0.097 | 0.012 | ++  | 0.444 | 0.023 |

|    |     |       |       |     |       |       |
|----|-----|-------|-------|-----|-------|-------|
| 76 | 23C | 0.204 | 0.003 | ++  | 0.536 | 0.039 |
| 77 | 24A | 0.458 | 0.027 | +++ | 0.712 | 0.006 |
| 78 | 24G | 0.450 | 0.043 | +++ | 0.734 | 0.004 |
| 79 | 24C | 0.416 | 0.045 | +++ | 0.730 | 0.015 |
| 80 | wt  | 0.412 | 0.056 | +++ | 0.624 | 0.043 |

In vitro integration is the fraction of linearized attP substrate converted to product.

In vivo integration is the transformation efficiency of an attP suicide plasmid;  
 +: < 10%; ++: 10-60%; +++: > 60% of wild-type attP

attP binding is  $1-f_s$ , where  $f_s$  is the fraction of labeled wild-type attP shifted in competition with mutant attP
